# Supplementary material
Source: Springer Nature journal article supplement (https://www.springermedizin.de/resource/supplementary/12998_2010_9_MOESM6_ESM.pdf/9680028)
Supplement: MOESM6 [file 9680028]

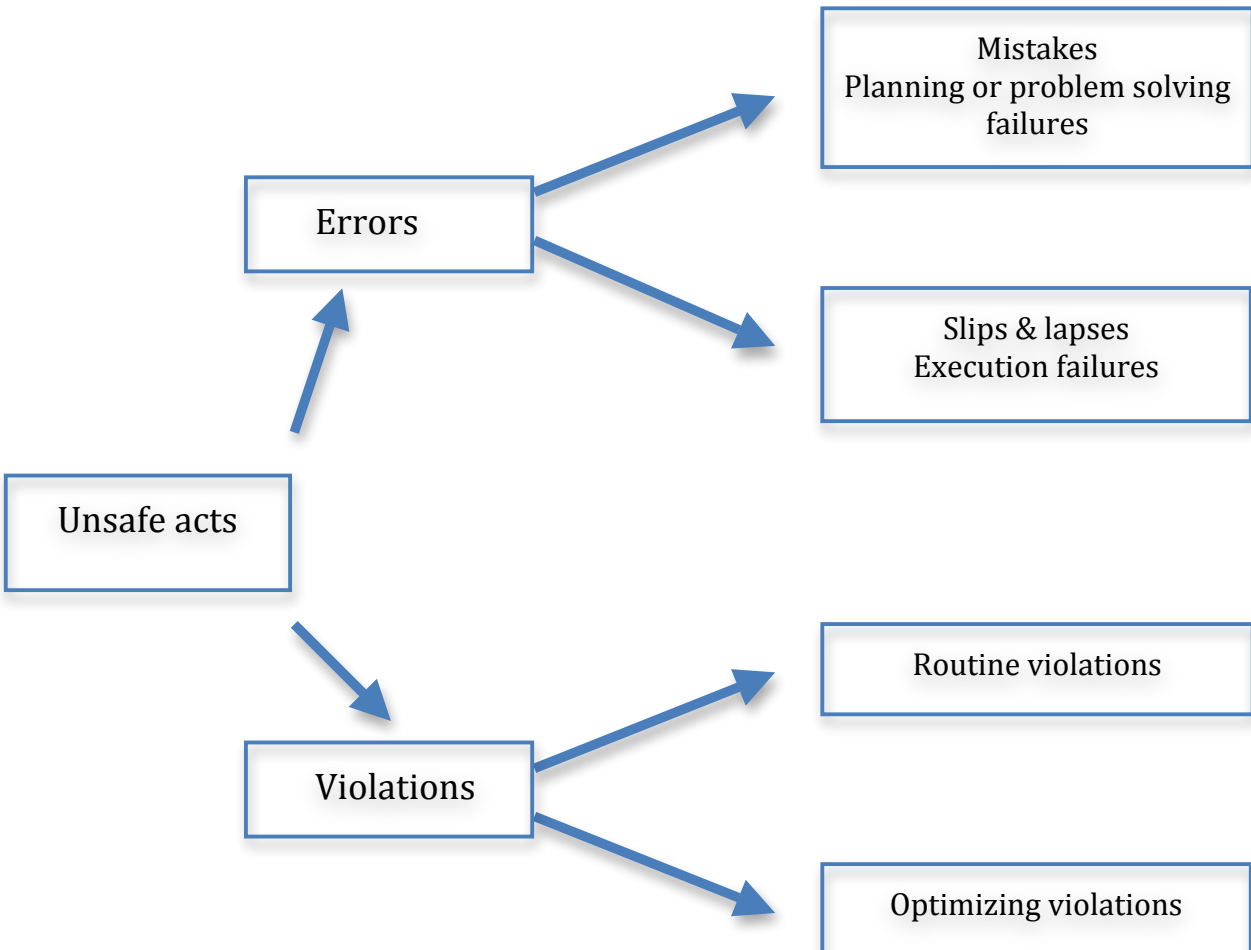

Errors

Mistakes  
Planning or problem solving failures

Slips & lapses  
Execution failures

Unsafe acts

Violations

Routine violations

Optimizing violations
